# Supplementary material for: Rapid naked-eye colorimetric detection of gaseous alkaline analytes using rhodamine B hydrazone-coated silica strips
Source: Royal Society of Chemistry journal article supplement (doi:10.1039/d0nj01044h), 2020-01-01
Supplement: d0nj01044h1.pdf [file d0nj01044h1.pdf]

## **Rapid naked-eye colorimetric detection of gaseous alkaline analytes using rhodamine B hydrazone-coated silica strips**

Hany F. Nour\* and Tamer El Malah\*

Photochemistry Department, Chemical Industries Research Division, National Research Centre, 33 El Buhouth Street, P.O. Box 12622, Cairo, Egypt

\*Corresponding authors: hany.nour@daad-alumni.de (Hany F. Nour) and tmara\_nrc3000@yahoo.com (Tamer El Malah)

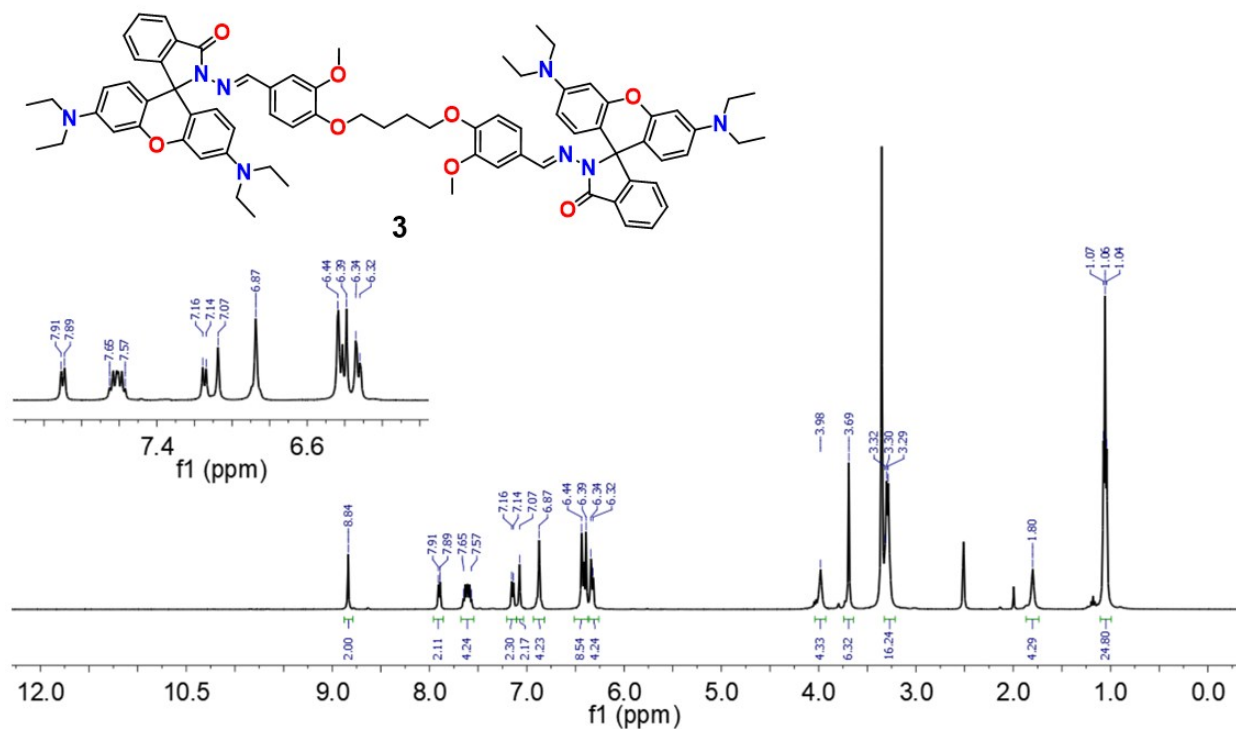

**Figure 1.**  $^1\text{H}$  NMR spectrum of *bis*-rhodamine B hydrazone **3** (DMSO- $d_6$ , 400 MHz, 298 K).

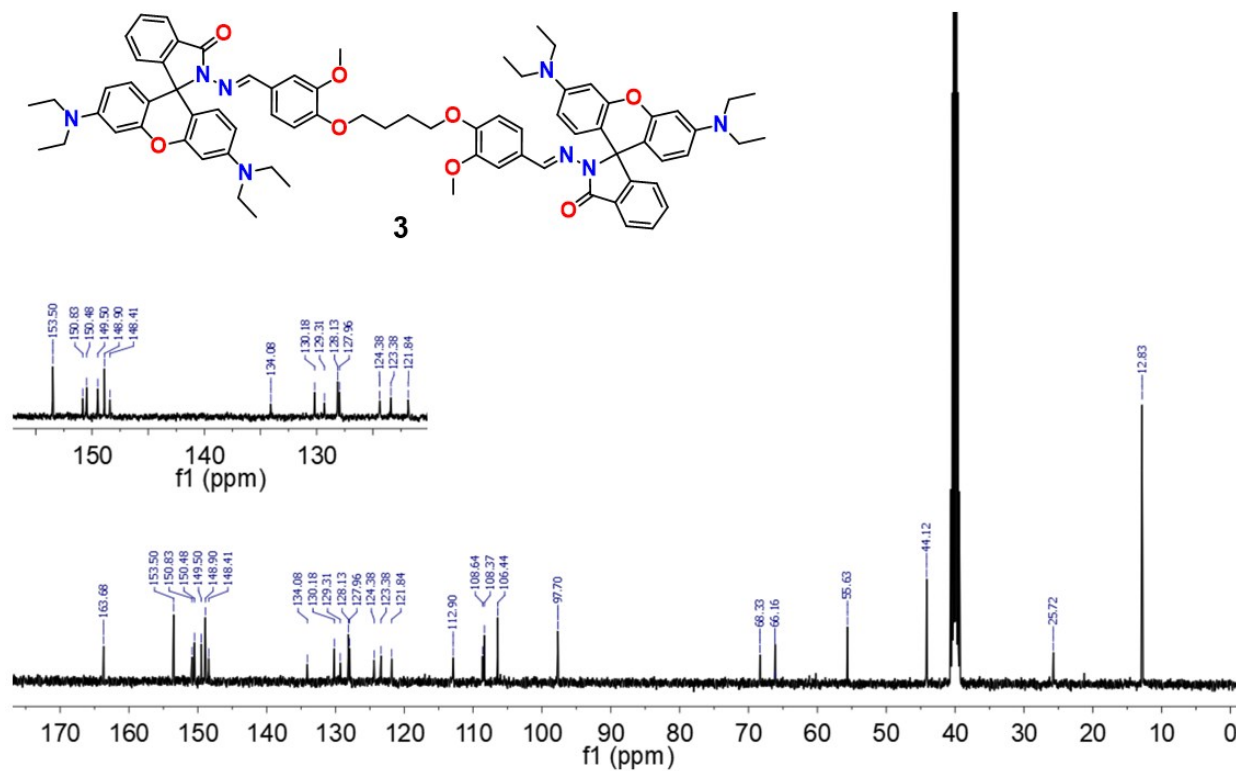

**Figure 2.**  $^{13}\text{C}$  NMR spectrum of *bis*-rhodamine B hydrazone **3** (DMSO- $d_6$ , 100 MHz, 298 K).

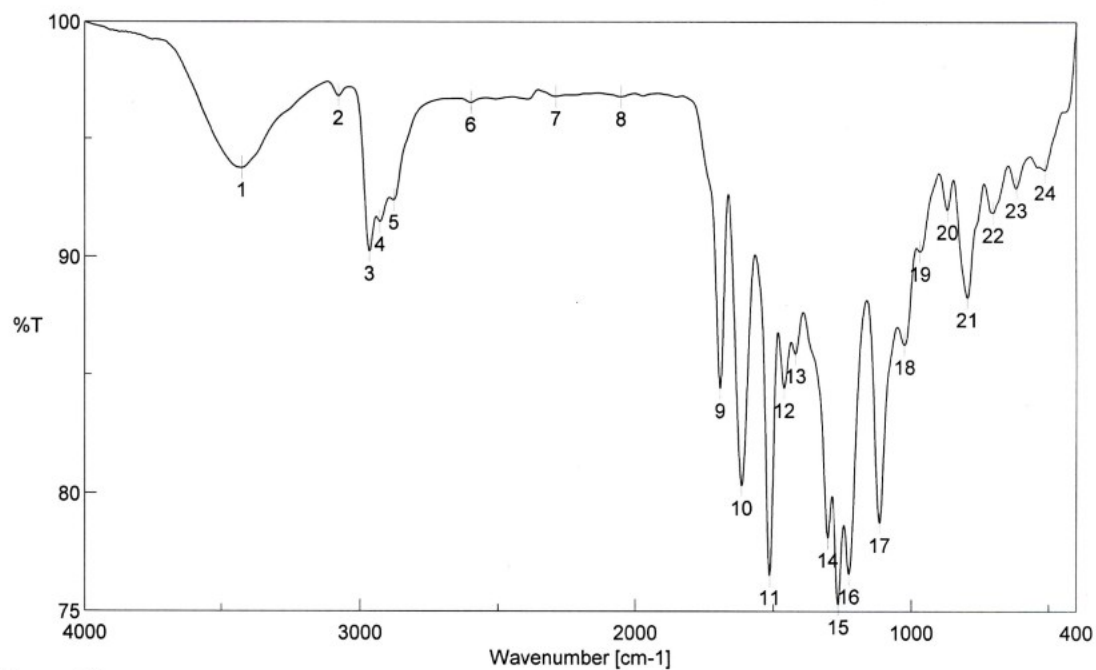

[Comments]

Sample name N4  
 Comment 7/2019  
 User IR  
 Division IR  
 Company MAC

[ Result of Peak Picking ]

| No. | Position | Intensity | No. | Position | Intensity | No. | Position | Intensity |
|-----|----------|-----------|-----|----------|-----------|-----|----------|-----------|
| 1   | 3427.85  | 93.7608   | 2   | 3077.83  | 96.8358   | 3   | 2966.95  | 90.2274   |
| 4   | 2928.38  | 91.4774   | 5   | 2879.2   | 92.3865   | 6   | 2598.61  | 96.5477   |
| 7   | 2288.13  | 96.8174   | 8   | 2051.89  | 96.7901   | 9   | 1693.19  | 84.4153   |
| 10  | 1615.09  | 80.3126   | 11  | 1513.85  | 76.5253   | 12  | 1461.78  | 84.4204   |
| 13  | 1421.28  | 85.8797   | 14  | 1303.64  | 78.1061   | 15  | 1266.04  | 75.2969   |
| 16  | 1227.47  | 76.5703   | 17  | 1116.58  | 78.7301   | 18  | 1025.94  | 86.2576   |
| 19  | 969.055  | 90.2302   | 20  | 867.81   | 91.9956   | 21  | 795.493  | 88.2754   |
| 22  | 700.998  | 91.8673   | 23  | 617.109  | 92.9188   | 24  | 512.008  | 93.6844   |

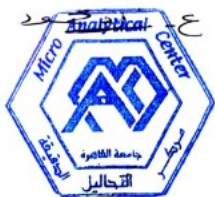

Figure 3. FT IR spectrum of compound rhodamine B hydrazone 3.
